# Supplementary material for: Current Trends in Nanomaterials for Metal Oxide-Based Conductometric Gas Sensors: Advantages and Limitations—Part 2: Porous 2D Nanomaterials
Source: MDPI journal article supplement (doi:10.3390/nano13020237), 2023-01-05
Supplement: s1 [file s1]

## Supplementary files

Table S1. Parameters of gas sensors based on porous 2D metal oxide nanostructures

| Material (Form)<br>(Technology)                      | GST | STR | T, nm   | PD, $\mu\text{m}$ | PS, nm | T <sub>oper</sub> , °C | Target gas                                   | C <sub>gas</sub> , ppm | Response                                 | DL, ppm | Res./Rec. time, s | Ref. |
|------------------------------------------------------|-----|-----|---------|-------------------|--------|------------------------|----------------------------------------------|------------------------|------------------------------------------|---------|-------------------|------|
| SnO <sub>2</sub> (NF) (SnS <sub>2</sub> calcination) | DC  | 3D  | ~30     | 0.5-1.0           | ~18    | 220                    | Ethanol                                      | 100                    | R <sub>air</sub> /R <sub>gas</sub> ~ 7   | <5      | 8/17              | 1    |
| SnO <sub>2</sub> (NF) (HT)                           | CT  | 3D  | N/A     | N/A               | N/A    | 200                    | Ethanol                                      | 200                    | R <sub>air</sub> /R <sub>gas</sub> ~46   | <20     | 6/5               | 2    |
| SnO <sub>2</sub> :CeO <sub>2</sub> (NS) (HT)         | CT  | 2D  | 15-30   | 0.8-1.0           | 20-30  | 340                    | Ethanol                                      | 100                    | R <sub>air</sub> /R <sub>gas</sub> ~44   | <5      | 25/6              | 3    |
| SnO <sub>2</sub> :CeO <sub>2</sub> (NS)              | CT  | 2D  | N/A     | 10-15             | 10-15  | 160                    | 3H-2B                                        | 50                     | R <sub>air</sub> /R <sub>gas</sub> ~620  | ~1      | 29/172            | 4    |
| SnO <sub>2</sub> :NiO(5%) (NS) (HT)                  | CT  | 3D  | 10-20   | 1-2               | 3-4    | 100                    | HCHO                                         | 100                    | R <sub>air</sub> /R <sub>gas</sub> ~39   | <5      | 28/115            | 5    |
| SnO <sub>2</sub> (NS) (HT)                           |     |     |         |                   |        | 200                    |                                              |                        | R <sub>air</sub> /R <sub>gas</sub> ~11   |         | 53/99             |      |
| SnO <sub>2</sub> (NS) (HT)                           | CT  | 3D  | N/A     | ~2                | 27     | 340                    | Acetic acid                                  | 100                    | R <sub>air</sub> /R <sub>gas</sub> ~132  | <20     | 11/6              | 6    |
| WO <sub>3</sub> (NF) (LA)                            | DC  | 2D  | ~50     | 1.5-3.5           | ~20    | 250                    | Ethanol                                      | 100                    | R <sub>air</sub> /R <sub>gas</sub> ~ 3   | <10     | N/A               | 7    |
| WO <sub>3</sub> :Pd (NF) (ST)                        | ISG | 3D  | 20-40   | ~1                | 4-100  | 200                    | NO                                           | 20                     | R <sub>gas</sub> /R <sub>air</sub> ~200  | <1      | 135/50            | 8    |
| WO <sub>3</sub> (NS) (CBD)                           | ISG | 3D  | 20      | N/A               | N/A    | 100                    | NO <sub>2</sub>                              | 10                     | R <sub>gas</sub> /R <sub>air</sub> ~ 460 | < 1     | 54/63             | 9    |
| WO <sub>3</sub> -rGO(20%) (NS) (HT)                  | CT  | 2D  | N/A     | 0.3-0.5           | N/A    | 90                     | NO <sub>2</sub>                              | 10                     | R <sub>gas</sub> /R <sub>air</sub> ~4    | 1-2     | 10/9              | 10   |
| ZnO (NF) (HT)                                        | CT  | 2D  | N/A     | N/A               | N/A    | 350                    | Ethanol                                      | 50                     | R <sub>air</sub> /R <sub>gas</sub> ~ 22  | N/A     | 12/14             | 11   |
|                                                      |     | 3D  |         | 1-2               |        |                        |                                              |                        | R <sub>air</sub> /R <sub>gas</sub> ~ 87  |         | 7/9               |      |
| ZnO (NF) (PM)                                        | ISG | 3D  | ~9      | 0.4-0.7           | 3-50   | 250                    | Ethanol                                      | 50                     | R <sub>air</sub> /R <sub>gas</sub> ~ 37  | <2      | 14/8              | 12   |
| ZnO (NS) (HT)                                        | CT  | 2D  | ~100    | N/A               | ~80    | 400                    | Ethanol                                      | 100                    | R <sub>air</sub> /R <sub>gas</sub> ~11   | <10     | 12/231            | 13   |
| ZnO (NS) (CS)                                        | CT  | 3D  | 12-20   | 3-5               | ~5     | 320                    | Ethanol                                      | 100                    | R <sub>air</sub> /R <sub>gas</sub> ~24   | < 1     | 3/15              | 14   |
| ZnO (NS) (HT)                                        | CT  | 3D  | 10-40   | 3-6               | 9-45   | 400                    | Ethanol                                      | 200                    | R <sub>air</sub> /R <sub>gas</sub> ~400  | ~0.0.1  | N/A               | 15   |
| ZnO (NS) (ST)                                        | CT  | 3D  | 20-40   | 1-2               | 7-25   | 280                    | Ethanol                                      | 100                    | R <sub>air</sub> /R <sub>gas</sub> ~24   | <5      | 6/23              | 16   |
|                                                      |     |     |         |                   |        |                        | Acetone                                      |                        | R <sub>air</sub> /R <sub>gas</sub> ~32   |         | 5/28              |      |
| ZnO (NF) (HT)                                        | CT  | 3D  | 20      | 1-3               | 3-40   | 420                    | Acetone                                      | 100                    | R <sub>air</sub> /R <sub>gas</sub> ~17   | <5      | 9/8               | 17   |
| ZnO (NS) (HT)                                        | ISG | 3D  | N/A     | ~0.5              | 2-10   | 400                    | Ethanol                                      | 50                     | R <sub>air</sub> /R <sub>gas</sub> ~5    | 9/22    | ~2                | 18   |
|                                                      |     |     |         |                   |        | 400                    | Acetone                                      | 50                     | R <sub>air</sub> /R <sub>gas</sub> ~16   | 9/22    | <1                |      |
|                                                      |     |     |         |                   |        | 200                    | H <sub>2</sub> S                             | 2.5                    | R <sub>air</sub> /R <sub>gas</sub> ~ 163 | 3/43    | <1                |      |
| ZnO (NS) (CS)                                        | CT  | 2D  | 2.9-3.4 | N/A               | N/A    | 340                    | C <sub>5</sub> H <sub>8</sub> O <sub>2</sub> | 100                    | R <sub>air</sub> /R <sub>gas</sub> ~190  | ~ 1     | 19/94             | 19   |
| ZnO (NF) (MHT)                                       | CT  | 3D  | 40-80   | N/A               | 30-60  | 170                    | NO <sub>2</sub>                              | 0.5                    | R <sub>gas</sub> /R <sub>air</sub> ~ 125 | <0.1    | N/A               | 20   |
| ZnO (NS) (ST)                                        | DC  | 2D  | 80      | ~1                | 60     | 200                    | NO <sub>2</sub>                              | 0.01                   | R <sub>gas</sub> /R <sub>air</sub> ~75   | ~0.1    | N/A               | 21   |
| ZnO (NS) (HT)                                        | SP  | 2D  | ~15     | 0.5               | ~26    | 250                    | NH <sub>3</sub>                              | 100                    | R <sub>air</sub> /R <sub>gas</sub> ~6    | < 10    | 8/17              | 22   |

|                                                        |       |     |    |        |          |        |     |                               |      |                                                                                    |       |                  |    |
|--------------------------------------------------------|-------|-----|----|--------|----------|--------|-----|-------------------------------|------|------------------------------------------------------------------------------------|-------|------------------|----|
|                                                        |       |     |    |        |          |        |     | HCHO                          |      | R <sub>air</sub> /R <sub>gas</sub> ~4                                              |       | 13/22            |    |
| ZnO (NS) (HT)                                          |       | CT  | 3D | 30-80  | 1-2      | ~40    | 370 | DMA                           | 200  | R <sub>air</sub> /R <sub>gas</sub> ~2000                                           | <1    | 16/15            | 23 |
| ZnO: Pd (NS) (CS+R)                                    |       | ISG | 3D | N/A    | ~1       | N/A    | 220 | CO                            | 100  | R <sub>air</sub> /R <sub>gas</sub> ~15                                             | 20    | 100/255          | 24 |
| ZnO (NS) (CS)                                          |       | CT  | 2D | N/A    | 1-2      | 14     | 320 | Isopropanol                   | 100  | R <sub>air</sub> /R <sub>gas</sub> ~10                                             | ~1    | N/A              | 25 |
| ZnO: CdS (NS) (CS)                                     |       |     |    |        |          | 47     |     |                               |      | R <sub>air</sub> /R <sub>gas</sub> ~33                                             | N/A   |                  |    |
| In <sub>2</sub> O <sub>3</sub> (NS) (ST)               |       | CT  | 3D | 20     | 1-2      | ~50    | 140 | NO <sub>2</sub>               | 0.2  | R <sub>gas</sub> /R <sub>air</sub> ~ 40                                            | <0.01 | N/A              | 26 |
| In <sub>2</sub> O <sub>3</sub> (NS) (HT)               |       | CT  | 3D | 15-30  | 1-2      | 5-25   | RT  | NO <sub>2</sub>               | 0.5  | R <sub>gas</sub> /R <sub>air</sub> ~620                                            | N/A   | 600/900          | 27 |
| In <sub>2</sub> O <sub>3</sub> (NS) (HT)               |       | CT  | 2D | ~4     | 0.5      | ~4     | 120 | NO <sub>x</sub>               | 10   | R <sub>gas</sub> /R <sub>air</sub> ~213                                            | ~0.01 | 4/10             | 28 |
| In <sub>2</sub> O <sub>3</sub> (NS) (HT)               |       | CT  | 3D | ~3     | ~1       | 3-5    | 270 | Ethanol                       | 100  | R <sub>air</sub> /R <sub>gas</sub> ~ 66                                            | ~0.5  | 12/10            | 29 |
| In <sub>2</sub> O <sub>3</sub> : Ag, Pd (NS) (CS)      |       | CT  | 3D | N/A    | 3.5-5    | 2-50   | 180 | Toluene,                      | 1    | R <sub>air</sub> /R <sub>gas</sub> ~ 16                                            | ~0.02 | 7/13             | 30 |
| In <sub>2</sub> O <sub>3</sub> : Yb (NS) (ST)          |       | CT  | 2D | 23     | 0.2      | N/A    | 220 | Acetone                       | 50   | R <sub>air</sub> /R <sub>gas</sub> ~15                                             | <5    | <10/<10          | 31 |
| Co <sub>3</sub> O <sub>4</sub> (NS) (HT)               |       | CT  | 2D | 30     | 3-5      | ~3     | 150 | Acetone                       | 100  | R <sub>air</sub> /R <sub>gas</sub> ~ 11                                            | <10   | N/A              | 32 |
| Co <sub>3</sub> O <sub>4</sub> : Mn (NS) (ST)          |       | CN  | 2D | N/A    | N/A      | 2.3    | 125 | CO                            | 40   | R <sub>air</sub> /R <sub>gas</sub> ~ 3.8                                           | 0.5   | 12/26            | 33 |
| Co <sub>3</sub> O <sub>4</sub> : CdS (NS)              |       | ISG | 3D | 3      | 1        | 2-100  | RT  | H <sub>2</sub> S              | 100  | R <sub>air</sub> /R <sub>gas</sub> ~13                                             | 1-5   | 0.6/1            | 34 |
| CuO (NS) (HT)                                          |       | ISG | 2D | 62     | 0.5-1.2  | 5-17   | RT  | H <sub>2</sub> S              | 0.01 | R <sub>air</sub> /R <sub>gas</sub> ~1.25                                           | N/A   | 234/76           | 35 |
| CeO <sub>2</sub> (NS) (HT-D)                           |       | N/A | 2D | N/A    | N/A      | ~15    | 450 | CO                            | 500  | R <sub>air</sub> /R <sub>gas</sub> ~1.12                                           | ~10   | 2/2              | 36 |
| TiO <sub>2</sub> : Pd (NS) (TM)                        |       | CT  | 2D | N/A    | 1-10     | 3-8    | 230 | H <sub>2</sub>                | 1000 | R <sub>air</sub> /R <sub>gas</sub> ~9                                              | ~1    | 1.6/1.4          | 37 |
| CuO (NS) (HT-D)                                        | c-CuO | CT  | 3D | N/A    | ~1       | 15-30  | 260 | Ethanol<br>HCHO               | 100  | R <sub>air</sub> /R <sub>gas</sub> ~15<br>R <sub>air</sub> /R <sub>gas</sub> ~11   | < 1   | 13/8<br>15/17    | 38 |
|                                                        | a-CuO |     |    |        |          |        |     | Ethanol<br>HCHO               | 50   | R <sub>air</sub> /R <sub>gas</sub> ~40<br>R <sub>air</sub> /R <sub>gas</sub> ~50   | <0.1  | 11/6<br>8/16     |    |
| CuO(NF)-rGO (HT)                                       |       | DC  | 2D | 20-40  | >1       | 2-2.5  | 23  | NO <sub>2</sub>               | 100  | R <sub>air</sub> /R <sub>gas</sub> ~150                                            | <0.05 | 7/50             | 39 |
| NiO (NS) (SCS)                                         |       | ISG | 2D | N/A    | N/A      | N/A    | 200 | Ethanol                       | 100  | R <sub>air</sub> /R <sub>gas</sub> ~ 2                                             | <10   | N/A              | 40 |
| NiO (NS) (HT)                                          |       | DC  | 3D | N/A    | 0.3-0.35 | ~5     | 150 | NH <sub>3</sub>               | 15   | R <sub>air</sub> /R <sub>gas</sub> ~1.9                                            | <2    | 140/70           | 41 |
| NiO (NS)                                               |       | ISG | 3D | <10    | <1       | 1.5-15 | 225 | Acetone                       | 0.1  | R <sub>air</sub> /R <sub>gas</sub> ~6                                              | <0.01 | N/A              | 42 |
| NiO (NS) (HT)                                          |       | CT  | 2D | ~15-20 | 0.2-0.4  | ~90    | 92  | N <sub>2</sub> H <sub>4</sub> | 100  | R <sub>air</sub> /R <sub>gas</sub> ~110                                            | ~0.01 | 50/30            | 43 |
| V <sub>2</sub> O <sub>5</sub> -NiO (NS) (CS)           |       | SP  | 3D | ~5     | ~20      | N/A    | 200 | H <sub>2</sub> S              | 0.5  | R <sub>air</sub> /R <sub>gas</sub> ~6.5                                            | 0.02  | 8/25             | 44 |
| NiO: Fe <sub>2</sub> O <sub>3</sub> (1.5%) (NS) (CS-D) |       | CT  | 3D | N/A    | N/A      | ~23    | 255 | Ethanol<br>Methanol           | 100  | R <sub>air</sub> /R <sub>gas</sub> ~170<br>R <sub>air</sub> /R <sub>gas</sub> ~108 | <5    | 0.5/15<br>0.1/11 | 45 |

C<sub>5</sub>H<sub>8</sub>O<sub>2</sub> – acetylacetone; CBD – chemical bath deposition; C(gas) – gas concentration; CS - chemical synthesis; CS+R - chemical synthesis+ reduction; CT - ceramic technology; DC - drop-casting method; DL – detector limit; DMA - dimethylamine; GST – gas sensor technology; 3H-2B - 3-hydroxy-2-butanone; HCHO – formaldehyde; HT –hydrothermal; HT-D – hydrothermal synthesis +decomposition; ISG - in-situ growth; LA – pulse laser ablation; MHT – microwave hydrothermal; N/A – not available; NF- nanoflakes; NS – nanosheets; PD - planar dimension; PM – precipitation method; PS - pore size; rGO – reduced graphene

oxide; RT – room temperature; SC - sonochemical method; SCS - solution combustion synthesis; SP - screen-printing; ST – solvothermal process; STR – structure; T - thickness; TM – template method;

## References

1. Q. Wang, D. Wang, M. Wu, B. Liu, J. Chen, T. Wang, J. Chen, Porous SnO<sub>2</sub> nanoflakes with loose-packed structure: Morphology conserved transformation from SnS<sub>2</sub> precursor and application in lithium ion batteries and gas sensors. *J. Phys. Chem. Solids* 72 (2011), 630-636.
2. O. Almamoun, S. Ma, A. Alshiply, Facile Synthesis of 3D Porous SnO<sub>2</sub> Nano Flakes by a Simple Hydrothermal Method and Their Ethanol Gas Sensor Properties. *Intern. J. Eng. Res. Manag. (IJERM)* 5 (3) (2018), 25-28.
3. S. Yan, X. Liang, H. Song, S. Ma, Y. Lu, Synthesis of porous CeO<sub>2</sub>-SnO<sub>2</sub> nanosheets gas sensors with enhanced sensitivity. *Ceram Intern.* 44 (2018), 358-363.
4. X.-Y. Yang, Y.-T. Shi, F.-L. Gong, J.-L. Chen, G.-X. Jin, Q. Guo, et al., Asymmetric interfacial oxygen sites of porous CeO<sub>2</sub>-SnO<sub>2</sub> nanosheets enabling highly sensitive and selective detection of 3-hydroxy-2-butanone biomarkers. *Sens. Actuators B* 371 (2022), 132500.
5. D. Meng, D. Liu, G. Wang, Y. Shen, X. San, M. Li, F. Meng, Low-temperature formaldehyde gas sensors based on NiO-SnO<sub>2</sub> heterojunction microflowers assembled by thin porous nanosheets. *Sens. Actuators B* 273 (2018) 418-428.
6. T.T. Wang, S.Y. Ma, L. Cheng, X.L. Xu, J. Luo, X.H. Jiang, W.Q. Li, W.X. Jin, X.X. Sun, Performance of 3D SnO<sub>2</sub> microstructure with porous nanosheets for acetic acid sensing. *Mater. Lett.* 142 (2015) 141-144.
7. J. Xiao, P. Liu, Y. Liang, H. B. Li and G. W. Yang, Porous tungsten oxide nanoflakes for highly alcohol sensitive performance Porous tungsten oxide nanoflakes for highly alcohol sensitive performance Porous tungsten oxide nanoflakes for highly alcohol sensitive performance. *Nanoscale*, 2012, 4, 7078-7083.
8. Z.-X. Cai, H.-Y. Li, J.-C. Ding, X. Guo, Hierarchical flowerlike WO<sub>3</sub> nanostructures assembled by porous nanoflakes for enhanced NO gas sensing. *Sens. Actuators B* 246 (2017) 225-234.
9. M. Wang, Y. Wang, X. Li, C. Ge, S. Hussain, G. Liu, G. Qiao, WO<sub>3</sub> porous nanosheet arrays with enhanced low temperature NO<sub>2</sub> gas sensing performance. *Sens. Actuators B* 316 (2020), 128050.
10. Q. Hao, T. Liu, J. Liu, Q. Liu, X. Jing, H. Zhang, G. Huang, J. Wang, Controllable synthesis and enhanced gas sensing properties of a single-crystalline WO<sub>3</sub>-rGO porous nanocomposite. *RSC Adv.* 7 (2017), 14192-14199.

11. W. Guo, T. Liu, J. Wang, W. Yu, R. Sun, Y. Chen, S. Hussain, X. Peng, Z. Wang, Hierarchical ZnO porous microspheres and their gas-sensing properties Hierarchical ZnO porous microspheres and their gas-sensing properties. *Ceram. Intern.* 39 (2013) 5919-5924.
12. F. Fan, P. Tang, Y. Wang, Y. Feng, A. Chen, R. Luo, D. Li, Facile synthesis and gas sensing properties of tubular hierarchical ZnO self-assembled by porous nanosheets. *Sens. Actuators B* 215 (2015) 231-240.
13. L.V. Duy, N.H. Hanh, D.N. Son, P.T. Hung, C.M. Hung, N.V. Duy, et al., Facile Hydrothermal Synthesis of Two-Dimensional Porous ZnO Nanosheets for Highly Sensitive Ethanol Sensor. *J. Nanomater.* 2019, 4867909.
14. J. Huang, Y. Wu, C. Gu, M. Zhai, Y. Sun, J. Liu, Fabrication and gas-sensing properties of hierarchically porous ZnO architectures. *Sens. Actuators B* 155 (2011) 126-133.
15. L. Zhang, J. Zhao, H. Lu, L. Li, J. Zheng, H. Li, Z. Zhu, Facile synthesis and ultrahigh ethanol response of hierarchically porous ZnO nanosheets. *Sens. Actuators B* 161 (2012) 209-215.
16. J. Li, H. Fan, X. Jia, Multilayered ZnO Nanosheets with 3D Porous Architectures: Synthesis and Gas Sensing Application. *J. Phys. Chem. C* 114 (2010), 14684–14691.
17. X. Wang, W. Liu, J. Liu, F. Wang, J. Kong, S. Qiu, C. He, L. Luan, Synthesis of Nestlike ZnO Hierarchically Porous Structures and Analysis of Their Gas Sensing Properties. *ACS Appl. Mater. Interfaces* 4 (2012), 817–82
18. Y. Zhu, Y. Wang, G. Duan, H. Zhang, Y. Li, G. Liu, L. Xu, W. Cai, In situ growth of porous ZnO nanosheet-built network film as high-performance gas sensor. 221 (2015), 350-356.
19. F. Liu, X. Wang, X. Chen, X. Song, J. Tian, H. Cui, Porous ZnO Ultrathin Nanosheets with High Specific Surface Areas and Abundant Oxygen Vacancies for Acetylacetone Gas Sensing. *ACS Appl. Mater. Interfaces* 11 (2019), 24757–24763.
20. M. Chen, Z. Wang, D. Han, F. Gu, G. Guo, Porous ZnO Polygonal Nanoflakes: Synthesis, Use in High-Sensitivity NO<sub>2</sub> Gas Sensor, and Proposed Mechanism of Gas Sensing. *J. Phys. Chem. C* 2011, 115, 12763–12773.
21. M.S. Choi, M.Y. Kim, A. Mirzaei, H.-S. Kim, S.-I. Kim, S.-H. Baek, et al., Selective, sensitive, and stable NO<sub>2</sub> gas sensor based on porous ZnO nanosheets. *Appl. Surf. Sci.* 568 (2021) 150910.

22. J. Liu, Z. Guo, F. Meng, T. Luo, M. Li, J. Liu, Novel porous single-crystalline ZnO nanosheets fabricated by annealing ZnS(en)<sub>0.5</sub> (en = ethylenediamine) precursor. Application in a gas sensor for indoor air contaminant detection. *Nanotechnology* 20 (2009) 125501.
23. L. Zhang, J. Zhao, H. Lu, L. Li, J. Zheng, J. Zhang, H. Li, Z. Zhu, Highly sensitive and selective dimethylamine sensors based on hierarchical ZnO architectures composed of nanorods and nanosheet-assembled microspheres. *Sens. Actuators B* 171-172 (2012b) 1101-1109.
24. N. Luo, B. Zhang, D. Zhang, J. Xu, Enhanced CO sensing properties of Pd modified ZnO porous nanosheets. *Chinese Chem. Lett.* 31 (2020) 2033-2036.
25. H. Zhang, Z. Jin, M.-D. Xu, Y. Zhang, J. Huang, H. Cheng, et al., Enhanced isopropanol sensing performance of the CdS nanoparticle decorated ZnO porous nanosheets based gas sensors. *IEEE Sensors J.* 21 (12) (2021a), 13041-13047.
26. X. Xu, X. Li, H. Zhang, C. Feng, C. Wang, F. Liu, Synthesis, characterization and gas sensing properties of porous flower-like indium oxide nanostructures. *RSC Adv.* 5 (2015), 30297-30302.
27. X. Xu, D. Wang, W. Wang, P. Sun, J. Ma, X. Liang, et al., Porous hierarchical In<sub>2</sub>O<sub>3</sub> nanostructures: Hydrothermal preparation and gas sensing properties. *Sens. Actuators B* 171-172 (2012a), 1066-1072.
28. X. Wang, J. Su, H. Chen, G.-D. Li, Z. Shi, H. Zou, X. Zou, Ultrathin In<sub>2</sub>O<sub>3</sub> nanosheets with uniform mesopores for highly sensitive nitric oxide detection. *ACS Appl. Mater. Interfaces* 9 (19) (2017), 16335–16342.
29. W. Qin, Z. Yuan, H. Gao, F. Meng, Ethanol Sensors Based on Porous In<sub>2</sub>O<sub>3</sub> Nanosheet-Assembled Micro-Flowers. *Sensors* 2020, 20, 3353;
30. X. Liu, X. Duan, C. Zhang, P. Hou, X. Xu, Improvement toluene detection of gas sensors based on flower-like porous indium oxide nanosheets. *J. Alloys Compounds* 897 (2022), 163222.
31. W.H. Zhang, S.-J. Ding, Q.-S. Zhang, H. Yi, Z.-X. Liu, M.-L. Shi, R.-F. Guan, L. Yue, Rare earth element-doped porous In<sub>2</sub>O<sub>3</sub> nanosheets for enhanced gas-sensing performance. *Rare Met.* 40(6) (2021b), 1662–1668.
32. Z. Zhang, Z. Wen, Z. Ye, L. Zhu, Gas sensors based on ultrathin porous Co<sub>3</sub>O<sub>4</sub> nanosheets to detect acetone at low temperature. *RSC Adv.* 5 (2015), 59976-59982.
33. C. Qin, B. Wang, Y. Wang, Metal-organic frameworks-derived Mn-doped Co<sub>3</sub>O<sub>4</sub> porous nanosheets and enhanced CO sensing performance. *Sens. Actuators B* 351 (2022) 130943.

34. M. Dun, J. Tan, W. Tan, M. Tang, X. Huang, CdS quantum dots supported by ultrathin porous nanosheets assembled into hollowed-out  $\text{Co}_3\text{O}_4$  microspheres: A room-temperature  $\text{H}_2\text{S}$  gas sensor with ultra-fast response and recovery. *Sens. Actuators B* 298 (2019) 126839.
35. Z. Li, N. Wang, Z. Lin, J. Wang, W. Liu, K. Sun, Y.Q. Fu, Z. Wang, Room-Temperature High-Performance  $\text{H}_2\text{S}$  Sensor Based on Porous CuO Nanosheets Prepared by Hydrothermal Method. *ACS Appl. Mater. Interfaces*, 8 (32) (2016), 20962-20968.
36. P. Li, B. Wang, Y. Wang, Ultrafast CO Sensor Based on Flame-annealed Porous  $\text{CeO}_2$  Nanosheets for Environmental Application. *J. Inorg. Mater.* 36 (11) (2021), 1223-1230.
37. D. Wang, J. Yang, L. Bao, Y. Cheng, L. Tian, Q. Ma, et al., Pd nanocrystal sensitization two-dimension porous  $\text{TiO}_2$  for instantaneous and high efficient  $\text{H}_2$  detection. *J. Colloid Interface Sci.* 597 (2021) 29-38.
38. Z. Tian, H. Bai, Y. Li, W. Liu, J. Li, Q. Kong, G. Xi, Gas-Sensing Activity of Amorphous Copper Oxide Porous Nanosheets. *ChemistryOpen* 9 (2020), 80–86.
39. H. Bai, H. Guo, J. Wang, Y. Dong, B. Liu, Z. Xie, et al., A room-temperature  $\text{NO}_2$  gas sensor based on CuO nanoflakes modified with rGO nanosheets. *Sens. Actuators B* 337 (2021), 129783.
40. C. Dong, X. Xiao, G. Chen, H. Guan, Y. Wang, I. Djerdj, Porous NiO nanosheets self-grown on alumina tube using a novel flash synthesis and their gas sensing properties. *RSC Adv.* 5 (2015), 4880-4885.
41. F.-R. Juang, C.-H. Hsieh, I.-Y. Huang, W.-Y. Wang, W.-B. Lin, L. Yen, Dispersed and spherically assembled porous NiO nanosheets for low concentration ammonia gas sensing applications. *Solid State Electron.* 189 (2022) 108224.
42. C. Li, P.G. Choi, K. Kim, Y. Masuda, High performance acetone gas sensor based on ultrathin porous NiO nanosheet. *Sens. Actuators B* 367 (2022), 132143.
43. S. Feng, H. Yu, X. Zhang, L. Huo, R. Gao, P. Wang, et al., Ionic liquid-assisted synthesis of 2D porous lotus root slice-shaped NiO nanomaterials for selective and highly sensitive detection of  $\text{N}_2\text{H}_4$ . *Sens. Actuators B* 359 (2022) 131529.
44. T. Qiu, N. Luo, M. Guo, H. Cai, Z. Cheng, J. Xu, Synthesis and Enhanced  $\text{H}_2\text{S}$  Sensing Properties of  $\text{V}_2\text{O}_3$  -NiO Nanoflower Assembled by Porous Nanosheets. *J. Electrochem. Soc.* 169 (2022), 037504.
45. W. Tan, J. Tan, L. Fan, Z. Yu, J. Qian, X. Huang,  $\text{Fe}_2\text{O}_3$ -loaded NiO Nanosheets for Fast Response/recovery and High Response Gas Sensor. *Sens. Actuators B* 256 (2018) 282-293.
